# Supplementary material
Source: publisher figshare collection journal article supplement (https://frontiersin.figshare.com/ndownloader/files/13824992)

## SUPPLEMENTARY MATERIALS

**Figure S1** (a) Example of field cage (divided in four arenas) placed on tarpaulin with foam sealant and duct tape for sealing the cage edges. (b) example of a 450 mm × 340 mm × 640 mm translucent bin with gauze lid placed inside one of the arenas with a 550 mm × 305 mm × 45 mm propagation tray of *Lolium* grass species.

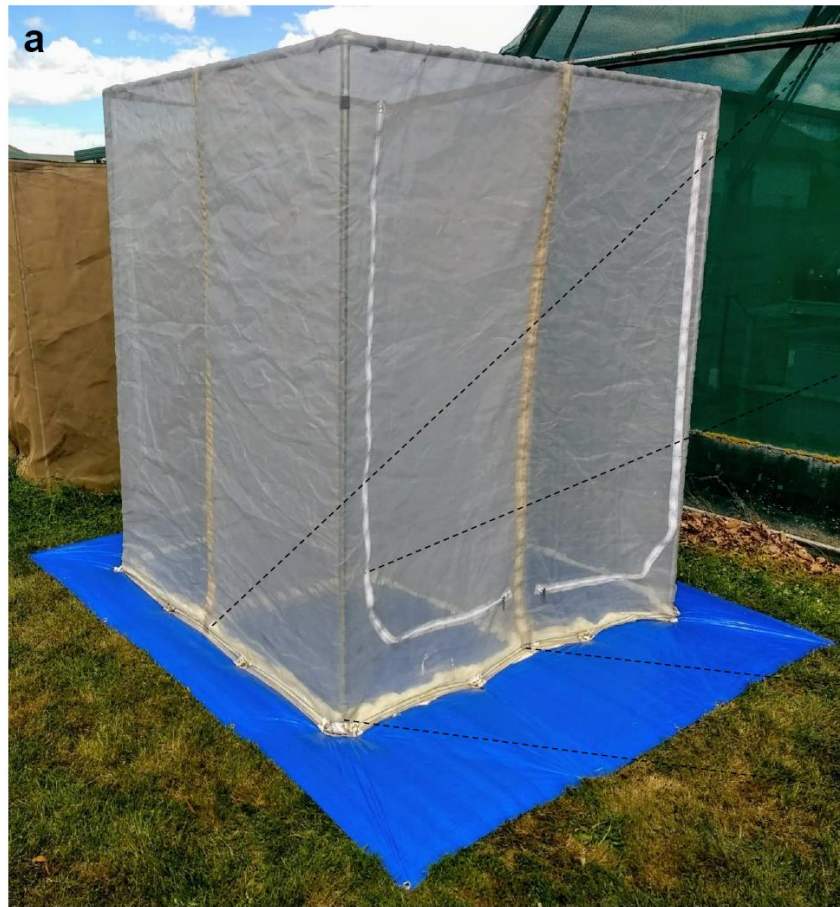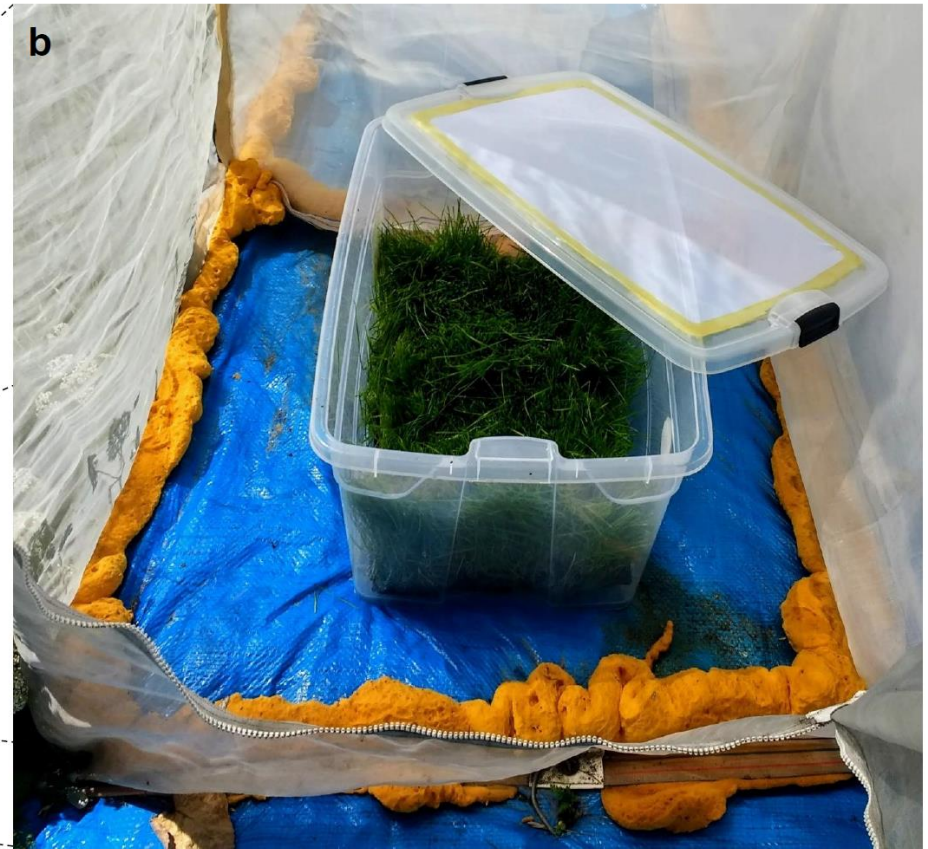

Supplement: Supplementary file 1 [file 13824992]
